# Supplementary material for: Analyses of the sucrose synthase gene family in cotton: structure, phylogeny and expression patterns
Source: PubMed Central journal article supplement (PMC3505178; doi:10.1186/1471-2229-12-85), 2012-06-13
Supplement: 1471-2229-12-85-S1.pdf [file 1471-2229-12-85-S1.pdf]

**Additional file 1.** Amino acid sequences analysis of the Sus genes from five cotton species.

| Sus proteins     | Amino acid size | Molecular weight(kDa) | Isoelectrical point |
|------------------|-----------------|-----------------------|---------------------|
| GaSus1           | 806             | 92.80                 | 6.52                |
| GaSus2           | 798             | 91.75                 | 6.58                |
| GaSus3           | 805             | 92.66                 | 6.54                |
| GaSus4           | 806             | 92.61                 | 6.67                |
| GaSus5           | 796             | 90.26                 | 6.26                |
| GaSus6           | 809             | 92.23                 | 6.39                |
| GaSus7           | 824             | 93.14                 | 7.27                |
|                  |                 |                       |                     |
| GbSus1           | 806             | 92.77                 | 6.52                |
| GbSus2           | 798             | 91.96                 | 6.46                |
| GbSus3           | 805             | 92.69                 | 6.54                |
| GbSus4           | 806             | 92.51                 | 6.40                |
| GbSus5           | 796             | 90.54                 | 6.83                |
| GbSus6           | 809             | 92.10                 | 6.39                |
| GbSus7           | 824             | 93.20                 | 7.31                |
|                  |                 |                       |                     |
| GcSus1           | 806             | 92.82                 | 6.43                |
| GcSus2           | 800             | 92.23                 | 6.63                |
| GcSus3           | 805             | 92.69                 | 6.38                |
| GcSus4           | 806             | 92.42                 | 6.40                |
| GcSus5           | 796             | 90.47                 | 6.40                |
| GcSus6           | 809             | 92.14                 | 6.33                |
| GcSus7           | 824             | 93.07                 | 7.26                |
|                  |                 |                       |                     |
| GdSus1           | 806             | 92.76                 | 6.58                |
| GdSus2           | 798             | 92.18                 | 6.55                |
| GdSus3           | 805             | 92.66                 | 6.52                |
| GdSus4           | 806             | 92.61                 | 6.46                |
| GdSus5           | 796             | 90.34                 | 6.43                |
| GdSus6           | 809             | 92.30                 | 6.33                |
| GdSus7           | 824             | 93.10                 | 7.07                |
|                  |                 |                       |                     |
| GkSus1           | 806             | 92.62                 | 6.36                |
| GkSus2           | 791             | 90.91                 | 6.10                |
| GkSus3           | 805             | 92.66                 | 6.54                |
| GkSus4 (Partial) | -               | -                     | -                   |
| GkSus5           | 796             | 90.44                 | 6.20                |
| GkSus6           | 809             | 92.11                 | 6.29                |
| GkSus7           | 824             | 93.52                 | 6.84                |
