# Supplementary material for: Analyses of the sucrose synthase gene family in cotton: structure, phylogeny and expression patterns
Source: PubMed Central journal article supplement (PMC3505178; doi:10.1186/1471-2229-12-85), 2012-06-13
Supplement: 1471-2229-12-85-S2.pdf [file 1471-2229-12-85-S2.pdf]

**Additional file 2.** Multiple alignment of the amino acid sequences between three *Sus* genes *GaSus1*, *GaSus3* and *GaSus4*.

```

GaSUS1  MAFVHITRVHSLRERLDLTLAHRNEVLALLSRIEGKKGKGIILHHQIILEFEAIPEDNRKKLADGAFSEHTIRASQEAIVLPPWVALAVRPRPGVWEYIRVNVHALVVEEL  110
GaSUS3  MADVHITRVHSLRERLDLTLAHRNEVLALLSRIEGKKGKGIILHHQIILEFEAIPEDNRKKLADGAFSEHTIRASQEAIVLPPWVALAVRPRPGVWEYIRVNVHALVVEEL  110
GaSUS4  MAFVHITRVHSLRERLDLTLAHRNEVLALLSRIEGKKGKGIILHHQIILEFEAIPEDNRKKLADGAFSEHTIRASQEAIVLPPWVALAVRPRPGVWEYIRVNVHALVVEEL  110
Consensusma r trvhslrerld tl ahrne lall riegkkgkil hhqiilefeaipee rkkla gaf e l asqeaivlppwvalavrprpgvweyi vnvhalvveel

GaSUS1  TVAEYILRFKEELVDGSSNANFVLELDFEFPNASSFPRHTLSKSIIGNGVEFLNRHLSAKLFHDKESMHPLLEFLRVHCHKGKNMMLNDRIQNLNSLQVLRKAEYIVLLEFA  220
GaSUS3  TVAEYILRFKEELVDGSSNANFVLELDFEFPNASSFPRHTLSKSIIGNGVEFLNRHLSAKLFHDKESMHPLLEFLRVHCHKGKNMMLNDRIQNLNSLQVLRKAEYIVLLEFA  220
GaSUS4  TVAEYILRFKEELVDGSSNANFVLELDFEFPNASSFPRHTLSKSIIGNGVEFLNRHLSAKLFHDKESMHPLLEFLRVHCHKGKNMMLNDRIQNLNSLQVLRKAEYIVLLEFA  220
Consensusv aeyl fkeelvdgs n nfvleldfepn sfrpr t lsksigngveflnrhlsaklfhdkesmhp lleflrvhchkgknmmlndriqnl n lq vlrkaeeyl lp

GaSUS1  ETEFADPEHFRFQEIIGLERGWGDTARVLEMIQLLLDLEAPDPTLEKFLGRIPMVFNVVILIPHGYYFAQDNVLYGYPDTGGQVVYILDQVRALENEMINRIRQQGLNITP  330
GaSUS3  ETEFADPEHFRFQEIIGLERGWGDTARVLEMIQLLLDLEAPDPTLEKFLGRIPMVFNVVILIPHGYYFAQDNVLYGYPDTGGQVVYILDQVRALENEMINRIRQQGLNITP  330
GaSUS4  ETEFADPEHFRFQEIIGLERGWGDTARVLEMIQLLLDLEAPDPTLEKFLGRIPMVFNVVILIPHGYYFAQDNVLYGYPDTGGQVVYILDQVRALENEMINRIRQQGLNITP  330
Consensusetp e eh fqeiglergwg dta r vlemiql lldlleap dptle kflgr ipmvfnv viliphgyy faqdnvlyg ypd tggqvvyildqvra lenem i nrirqq glnitp

GaSUS1  RILIIIRLLPDAVGTTCGQRLEKVVYGTESDILRVPFRTKGIWRWISRFVWPVLETYTEIVAHEISKELQGGPDLIIGNYSDGNIVASLLAHKLGVTQCTIAHALEK  440
GaSUS3  RILIIIRLLPDAVGTTCGQRLEKVVYGTESDILRVPFRTKGIWRWISRFVWPVLETYTEIVAHEISKELQGGPDLIIGNYSDGNIVASLLAHKLGVTQCTIAHALEK  440
GaSUS4  RILIIIRLLPDAVGTTCGQRLEKVVYGTESDILRVPFRTKGIWRWISRFVWPVLETYTEIVAHEISKELQGGPDLIIGNYSDGNIVASLLAHKLGVTQCTIAHALEK  440
Consensusr ilii rllpdavgttcgqr lekvygte s dilrv pfrtek giwr wisrfewwpv letyeteiva heiskelqgk p dliigny s dgnivasllahkl gvtqctia halek

GaSUS1  TKYPDSDIYWKKLEDKYHFSCQFTADLHAMNHTDFIITSTFQEIAGSKDVTGQYESHAFITLGLYRVVHGIDVDFDPKFNIVSPGADMSIYFPYTEBRRLKHFHFEIE  550
GaSUS3  TKYPDSDIYWKKLEDKYHFSCQFTADLHAMNHTDFIITSTFQEIAGSKDVTGQYESHAFITLGLYRVVHGIDVDFDPKFNIVSPGADMSIYFPYTEBRRLKHFHFEIE  550
GaSUS4  TKYPDSDIYWKKLEDKYHFSCQFTADLHAMNHTDFIITSTFQEIAGSKDVTGQYESHAFITLGLYRVVHGIDVDFDPKFNIVSPGADMSIYFPYTEBRRLKHFHFEIE  550
Consensus tky pdsdiywk kledkyhfscqftadl hamnhtdfiitstfqe iagskdvtgqyeshafitlgl yrvvhgidvdfdpkfnivspgadms iyfpytebr rrlkhfh feie

GaSUS1  LLYSKVENEHHCVLNDRNKPIIFTMARLDRVKNLTGLVEWYGKNAKLRLELVNLVVVGGDRRRESKDLEEKAEKMKMFELIKRIRLNGQFRWISSQMNRIRNGELRYIC  660
GaSUS3  LLYSKVENEHHCVLNDRNKPIIFTMARLDRVKNLTGLVEWYGKNAKLRLELVNLVVVGGDRRRESKDLEEKAEKMKMFELIKRIRLNGQFRWISSQMNRIRNGELRYIC  660
GaSUS4  LLYSKVENEHHCVLNDRNKPIIFTMARLDRVKNLTGLVEWYGKNAKLRLELVNLVVVGGDRRRESKDLEEKAEKMKMFELIKRIRLNGQFRWISSQMNRIRNGELRYIC  660
Consensusl llyskv eneeh cvln drnk pilftmarldr vknltglve wygknaklr elvnlvvv ggdr rreskdleekae kmmk mfe l ikr ir l ngqfr wissq mnr r ngelry ic

GaSUS1  DTRGAFVQPALYEAFLTVVEAMTCGLPTFATCGGPAEIIIVHGKSGFNIDPYHGDQAAIILVDFFDKCKRIPSEWNRISGGGLKRIBEKYTWKIYSERLLTLTGVYGFW  770
GaSUS3  DTRGAFVQPALYEAFLTVVEAMTCGLPTFATCGGPAEIIIVHGKSGFNIDPYHGDQAAIILVDFFDKCKRIPSEWNRISGGGLKRIBEKYTWKIYSERLLTLTGVYGFW  770
GaSUS4  DTRGAFVQPALYEAFLTVVEAMTCGLPTFATCGGPAEIIIVHGKSGFNIDPYHGDQAAIILVDFFDKCKRIPSEWNRISGGGLKRIBEKYTWKIYSERLLTLTGVYGFW  770
Consensusd trk gafvqpalyeaf ltvveamtcglptfatc ggpa eiiivhgksgfnidpyhgdqaa ilvdff dkckripsewnris ggglkri bek ytwkiy serlltltgvygf w

GaSUS1  KHVSNLDRRESRRYLEMFYALKYRRLAESVPLAEE  806
GaSUS3  KHVSNLDRRESRRYLEMFYALKYRRLAESVPLAEE  805
GaSUS4  KHVSNLDRRESRRYLEMFYALKYRRLAESVPLAEE  806
Consensuskhvsnl r esrrylemfyalkyrklaesvpla ee

```
