# Supplementary material for: Analyses of the sucrose synthase gene family in cotton: structure, phylogeny and expression patterns
Source: PubMed Central journal article supplement (PMC3505178; doi:10.1186/1471-2229-12-85), 2012-06-13

**Additional file 3.** Multiple alignment of the partial DNA sequence between five orthologs of *Sus7* cloned from four diploid cotton species *G. arboreum* (A2, *GaSus7*), *G. anomalum* (B1, *GbSus7*), *G. sturtianum* (C1, *GcSus7*) and *G. raimondii* (D5, *GdSus7*) and one outgroup species, *Gossypioides kirkii* (K, *GkSus7*). Corresponding regions shaded in colours represent sequence identities between these orthologous genes. The exon sequence is shown by single underline, and the intron sequences are shown by double underlines. The arrows upon the first intron sequence indicate the unusual GC/AG splicing sites in the *Sus7* genes. The SSRs (simple sequence repeats; microsatellites) in the five orthologs are boxed and shaded.

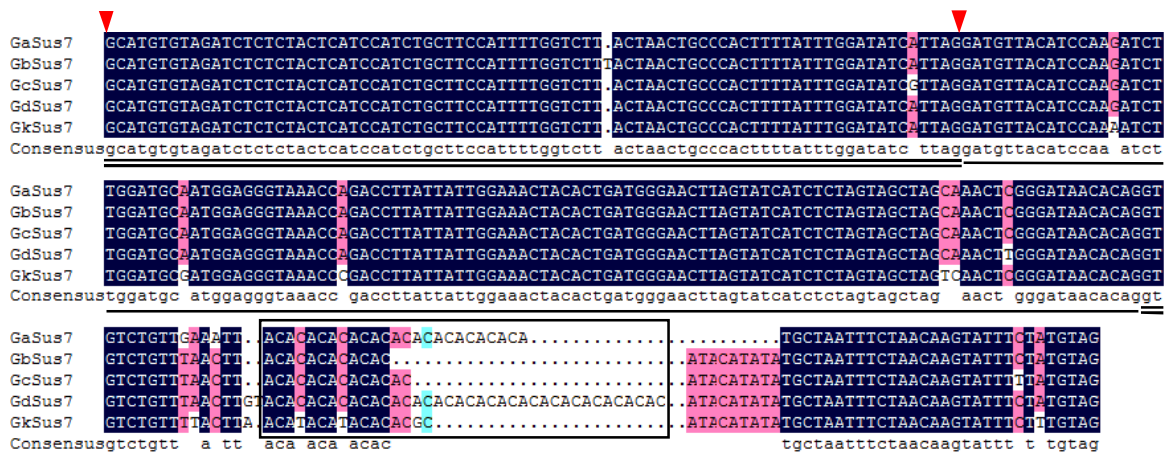

Supplement: 1471-2229-12-85-S3.pdf [file 1471-2229-12-85-S3.pdf]
