# Supplementary material for: Analyses of the sucrose synthase gene family in cotton: structure, phylogeny and expression patterns
Source: PubMed Central journal article supplement (PMC3505178; doi:10.1186/1471-2229-12-85), 2012-06-13
Supplement: 1471-2229-12-85-S4.pdf [file 1471-2229-12-85-S4.pdf]

**Additional file 4.** Gene-specific primers used for semi-quantitative RT-PCR amplification. The numbers out and in parentheses represent expected size of PCR products amplified from cDNA and genomic DNA, respectively.

| Gene          | Forward Primer             | Reverse Primer            | Expected size (bp) |
|---------------|----------------------------|---------------------------|--------------------|
| <i>GaSus1</i> | cggctctaccgtgtgttcacgga    | tgcccaaacatgaagagaaacaaat | 1063 (1236)        |
| <i>GaSus2</i> | tactggaaggagcttgaggat      | tccaccattggagatttcatt     | 0 (1079)           |
| <i>GaSus3</i> | ggtctctaccgtgtgtacatggt    | caagaaaaaccggccaatgttat   | 947 (1221)         |
| <i>GaSus4</i> | gcaaaggtggaccagctgaaatcatt | ccggccataaatatgaaaacaaca  | 464 (666)          |
| <i>GaSus5</i> | ataagtatcacttctcctgtcag    | caaggggaaacccaagttaaatt   | 1185 (1369)        |
| <i>GaSus6</i> | ggtggtcctgcagagattattgaaca | cgcaatcaaccagaccttaaat    | 405 (604)          |
| <i>GaSus7</i> | gcccgaggaactaagtgaacc      | tcggcaatgcaacggtagagt     | 962 (1323)         |
| <i>UBQ7</i>   | gaaggcattccacctgaccaac     | cttgaccttcttcttctgtgcttg  | 198 (198)          |
